# Supplementary material for: MiR-452-5p promotes colorectal cancer progression by regulating an ERK/MAPK positive feedback loop
Source: publisher site journal article supplement (doi:10.18632/aging.202657), 2021-03-03
Supplement: Supplementary file [file aging-v13i5-202657-supplementary-material-SD1.pdf]

SUPPLEMENTARY FIGURES

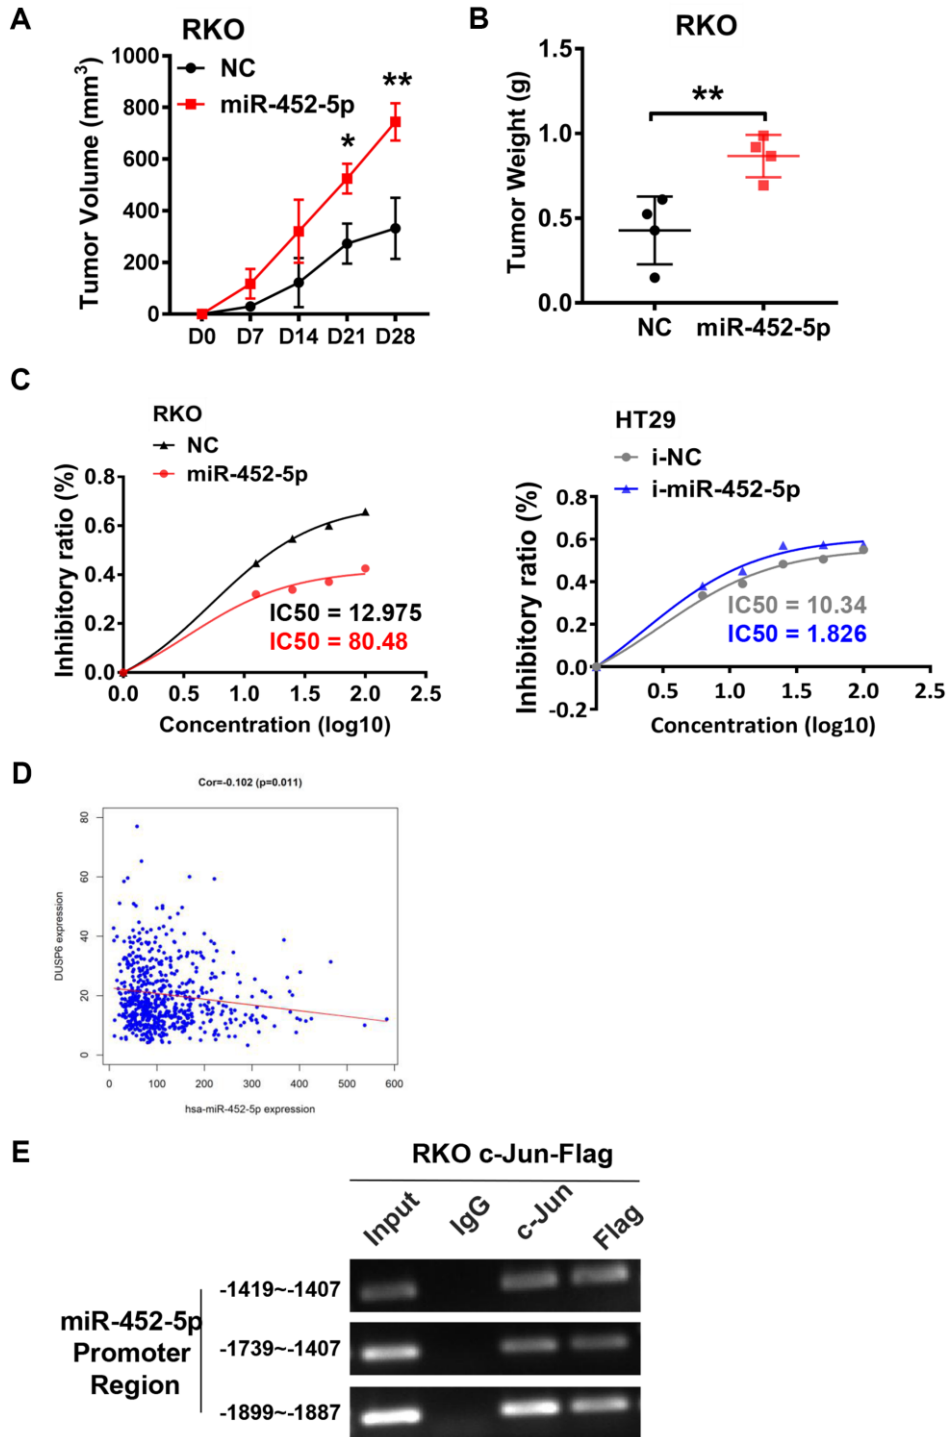

**Supplementary Figure 1.** (A) Subcutaneous tumor formation growth curve in nude mice. (B) Effect of overexpression of miR-452-5p on subcutaneous tumor formation weight. (C) Effects of overexpression and knockdown of miR-452-5p on chemosensitivity of CRC cells: IC50 test. (D) Spearman’s correlation analysis showed a positive correlation between DUSP6 and miR-452-5p expression according to TCGA datasets. (E) Chip-PCR verified the c-jun-binding regions in miR-452-5p promoter. \*p < 0.05, \*\*p < 0.01, \*\*\*p < 0.001.

**A**

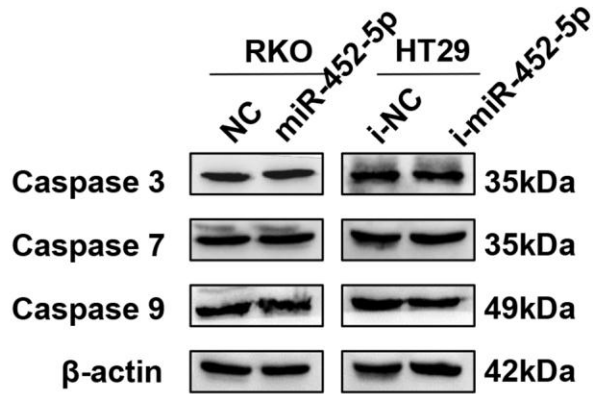

**B**

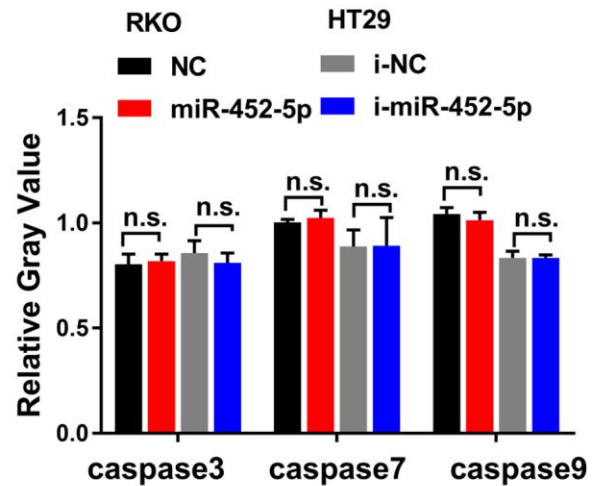

**C**

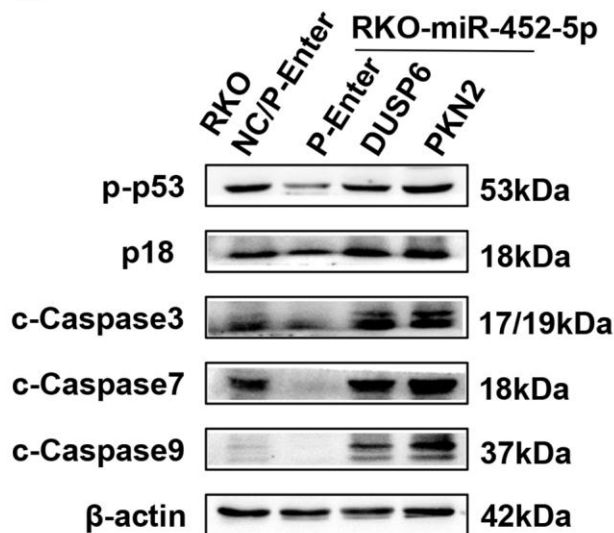

**D**

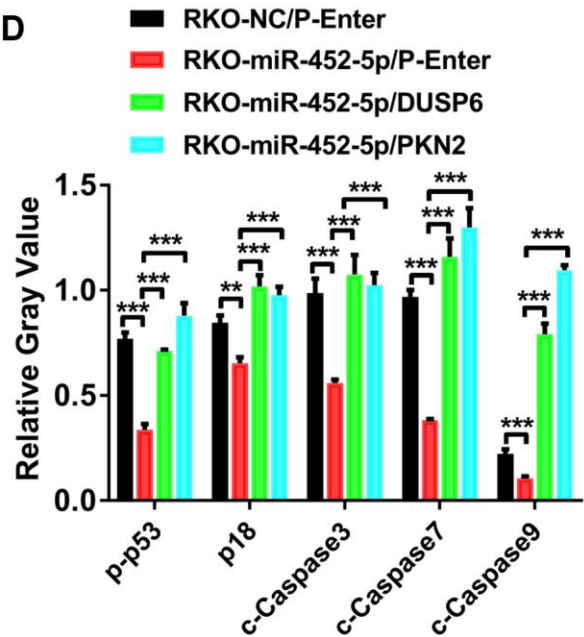

**Supplementary Figure 2.** (A) The expression of the full length caspase proteins detected by western blotting. (B) The average gray value analysis of the full length caspase proteins. (C) PKN2/DUSP6 axis was involved in the regulation of miR-452-5p on cell cycle and apoptosis signaling pathways. (D) The average gray value analysis of the protein expression of cell cycle and apoptosis signaling pathways after co-transfection with miR-452-5p mimics and PKN2, DUSP6 plasmids. \* $p < 0.05$ , \*\* $p < 0.01$ , \*\*\* $p < 0.001$ , n.s. non-significant.

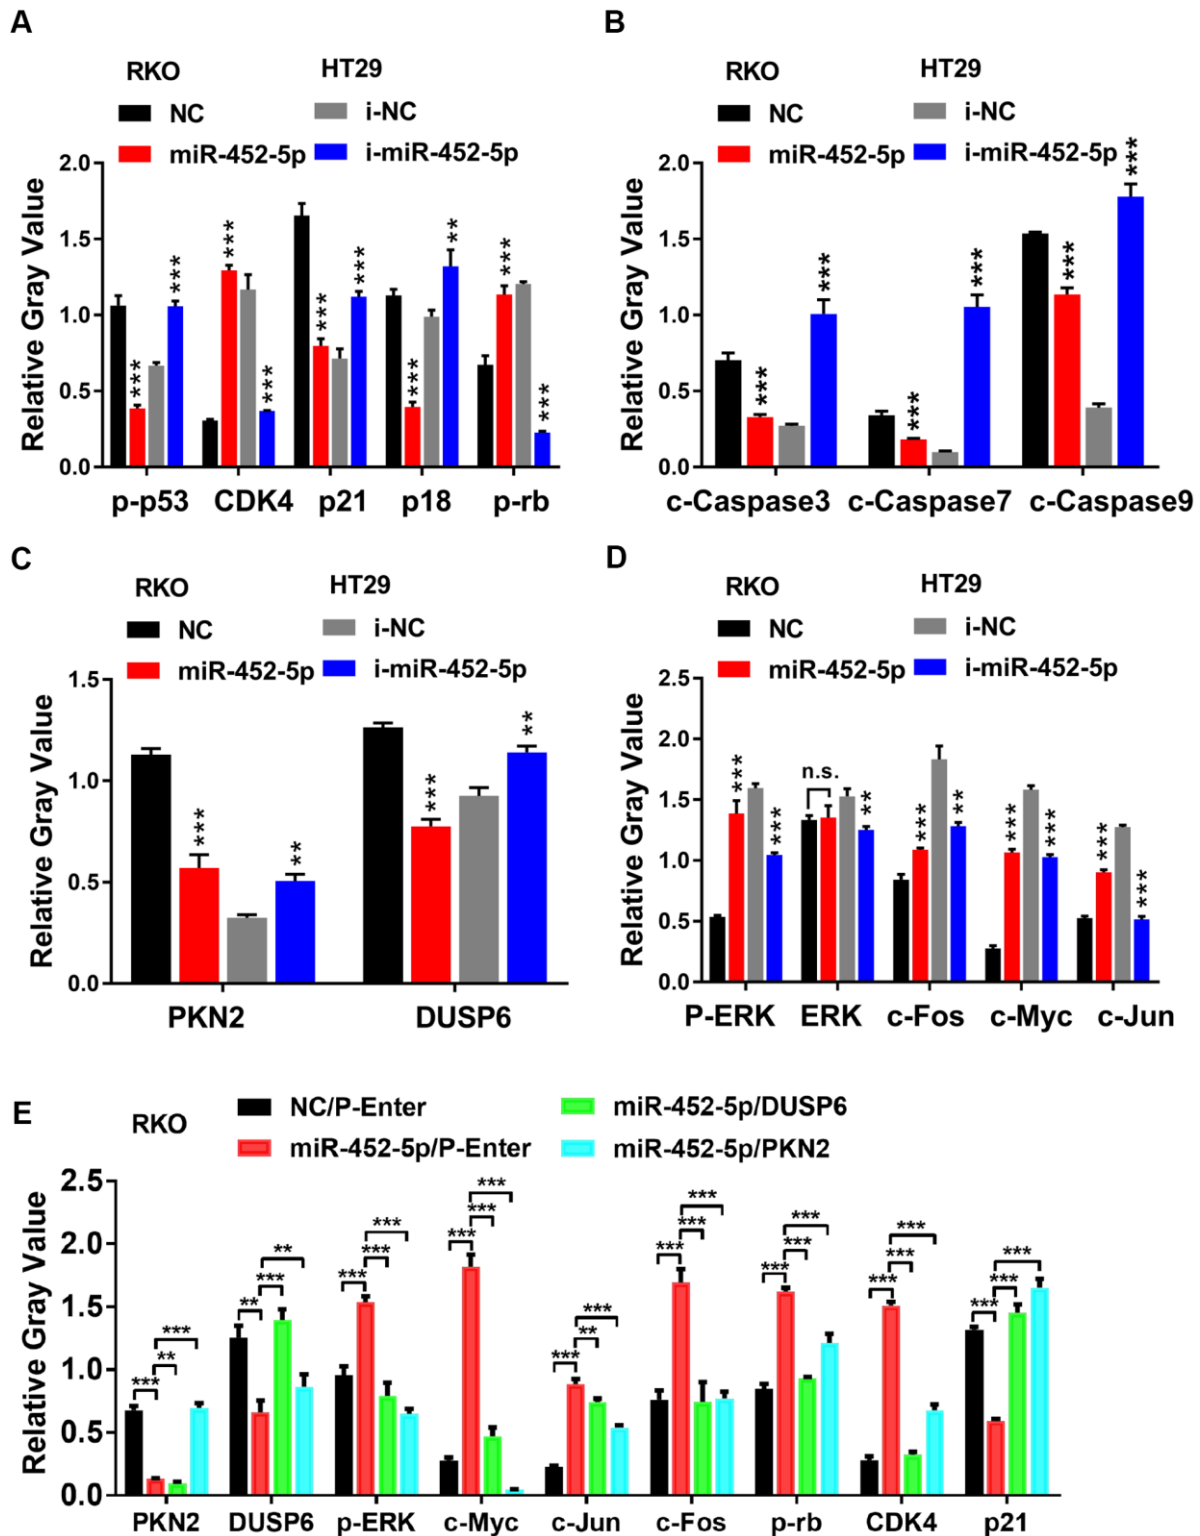

**Supplementary Figure 3.** The average gray values analysis of proteins (A) Cell cycle related proteins detected by western blotting. (B) The expression of apoptosis-related proteins detected by western blotting. (C) The expression of PKN2 and DUSP6 after overexpression and knockdown of miR-452-5p detected by western blotting. (D) Western blotting results of ERK/MAPK signaling pathway. \* $p < 0.05$ , \*\* $p < 0.01$ , \*\*\* $p < 0.001$ , n.s. non-significant. (E) The average gray values analysis of protein expression of the important CRC signaling pathways after co-transfection with miR-452-5p mimics and PKN2, DUSP6 plasmids. \* $p < 0.05$ , \*\* $p < 0.01$ , \*\*\* $p < 0.001$ .
